# Supplementary material
Source: HighWire-hosted journal article supplement (https://svn.smart01.highwire.org/content/9/3/279)
Supplement: inline-supplementary-material-1 [file inline-supplementary-material-1.pdf]

APPENDIX 1

Number of Thrombectomies with Stenting Per Year

| Year | Number of Stented Patients | Number of Patients who received IV Aspirin Perioperatively |
|------|----------------------------|------------------------------------------------------------|
| 2010 | 2                          | 0                                                          |
| 2011 | 5                          | 0 (0%)                                                     |
| 2012 | 6                          | 1 (18%)                                                    |
| 2013 | 9                          | 5 (56%)                                                    |
| 2014 | 8                          | 5 (63%)                                                    |
| 2015 | 13                         | 9 (79%)                                                    |
| 2016 | 18                         | 12 (67%)                                                   |
| 2017 | 11                         | 3 (27%)                                                    |
| 2018 | 12                         | 6 (50%)                                                    |
| 2019 | 9                          | 5 (56%)                                                    |
| 2020 | 9                          | 3 (33%)                                                    |
